# Supplementary material
Source: publisher figshare collection journal article supplement (https://gsajournals.figshare.com/ndownloader/files/15204143)
Supplement: Supplementary file 1 [file 15204143]

Table S1 Values of AIC and BIC for **GL**and **RL**matrices for organic matter (OM), crude protein (CP), *in vitro* digestibility of organic matter (IVD), leaf dry matter (LDM), regrowth capacity (RC), and percentage of leaf blade (PLB). The lowest values and selected variance and covariance (VCOV) structures are indicated in bold. NC means not converged.

| OM | | | | | | CP | | | | | | IVD | | | | | |
| --- | --- | --- | --- | --- | --- | --- | --- | --- | --- | --- | --- | --- | --- | --- | --- | --- | --- |
| ***GL***matrix | | | ***RL***matrix | | | ***GL***matrix | | | ***RL***matrix | | | ***GL***matrix | | | ***RL***matrix | | |
| VCOV | AIC | BIC | VCOV | AIC | BIC | VCOV | AIC | BIC | VCOV | AIC | BIC | VCOV | AIC | BIC | VCOV | AIC | BIC |
| ID | 3050.437 | 3079.553 | ID | 2782.262 | 2817.201 | ID | 3361.000 | 3390.117 | ID | 3192.723 | 3245.723 | ID | 9514.766 | 9543.883 | ID | 9404.834 | **9457.243** |
| DIAG | 3039.441 | 3086.027 | DIAG | 2714.927 | 2767.337 | DIAG | 3291.024 | 3337.610 | **DIAG** | 3140.123 | **3210.002** | DIAG | 9464.092 | 9504.855 | DIAG | 9389.082 | 9459.699 |
| CS | 2794.329 | 2829.269 | CS | 2767.056 | 2807.819 | CS | 3255.887 | 3290.827 | CS | NC | NC | CS | NC | NC | CS | 9402.301 | 9460.534 |
| CSHet | 2788.671 | 2841.080 | **CSHet** | **2707.356** | **2765.589** | CSHet | 3198.476 | 3250.885 | CSHet | 3140.954 | 3216.656 | CSHet | 9417.755 | 9470.164 | CSHet | 9390.690 | 9466.392 |
| AR1 | 2789.073 | 2824.012 | AR1 | 2776.316 | 2817.079 | AR1 | 3248.110 | 3283.050 | AR1 | 3192.149 | 3250.381 | AR1 | 9449.098 | 9484.038 | AR1 | NC | NC |
| AR1Het | 2784.013 | **2836.422** | AR1Het | 2708.434 | 2766.667 | **AR1Het** | 3192.723 | **3245.132** | AR1Het | **3139.881** | 3215.583 | **AR1Het** | **9404.834** | **9457.243** | **AR1Het** | **9388.671** | 9464.373 |
| **Po** | 2782.262 | 2817.201 | Po | NC | NC | Po | 3247.358 | 3282.298 | Po | 3182.825 | 3241.058 | Po | 9451.505 | 9486.445 | Po | 9406.217 | 9464.449 |
| PoHet | **2774.400** | 2826.809 | PoHet | NC | NC | PoHet | 3194.377 | 3246.786 | PoHet | 3141.987 | 3217.689 | PoHet | 9408.339 | 9460.749 | PoHet | 9390.424 | 9466.126 |
| US | NC | NC | US | 2708.135 | 2795.484 | US | **3177.022** | 3258.548 | US | NC | NC | US | 9404.935 | 9486.461 | US | NC | NC |
| LDM | | | | | | RC | | | | | | PLB | | | | | |
| ***GL***matrix | | | ***RL***matrix | | | ***GL***matrix | | | ***RL***matrix | | | ***GL***matrix | | | ***RL***matrix | | |
| VCOV | AIC | BIC | VCOV | AIC | BIC | VCOV | AIC | BIC | VCOV | AIC | BIC | VCOV | AIC | BIC | VCOV | AIC | BIC |
| ID | 53176.31 | 53202.40 | ID | 49748.58 | 49826.85 | ID | 4535.698 | 4568.329 | ID | 3486.283 | 3747.330 | ID | 28930.20 | 28962.82 | ID | 28263.53 | 28335.29 |
| DIAG | 52440.24 | 52505.47 | DIAG | NC | NC | DIAG | 4503.830 | 4582.143 | DIAG | 3427.027 | 3733.756 | **DIAG** | **28263.53** | **28335.29** | DIAG | 28204.11 | 28321.53 |
| CS | 51308.98 | 51341.60 | CS | 49105.14 | 49196.47 | CS | 3844.131 | 3883.288 | CS | 3449.976 | 3717.549 | CS | 28869.72 | 28908.86 | **CS** | 28194.27 | **28266.03** |
| CSHet | 50574.92 | 50653.19 | CSHet | NC | NC | CSHet | 3808.653 | 3893.493 | CSHet | NC | NC | CSHet | NC | NC | CSHet | NC | NC |
| AR1 | 50821.60 | 50860.74 | **AR1** | **48979.23** | **49070.55** | AR1 | 3697.371 | 3736.527 | AR1 | 3457.433 | 3725.006 | AR1 | 28930.09 | 28969.23 | AR1 | 28257.22 | 28335.50 |
| AR1Het | 49939.84 | 50018.11 | AR1Het | NC | NC | AR1Het | 3665.877 | 3750.717 | AR1Het | NC | NC | AR1Het | NC | NC | AR1Het | 28199.40 | 28323.34 |
| Po | NC | NC | Po | NC | NC | Po | 3650.286 | **3689.443** | **Po** | 3448.822 | **3716.395** | Po | 28918.42 | 28957.56 | Po | 28253.65 | 28331.93 |
| **PoHet** | 49748.58 | **49826.85** | PoHet | NC | NC | PoHet | 3612.722 | 3697.562 | PoHet | NC | NC | PoHet | 28266.38 | 28341.18 | PoHet | 28195.82 | 28319.76 |
| US | **49671.64** | 49932.55 | US | NC | NC | **US** | **3486.283** | 3747.330 | US | **3404.527** | 3893.989 | US | NC | NC | US | **28122.23** | 28422.30 |
